1 **Emergence and molecular basis of azithromycin resistance in typhoidal *Salmonella* in**  
2 **Dhaka, Bangladesh**

3 Yogesh Hooda<sup>1,2,#</sup>, Senjuti Saha<sup>1,3,#,\*</sup>, Mohammad S. I. Sajib<sup>1</sup>, Hafizur Rahman<sup>1</sup>, Stephen P.

4 Luby<sup>3</sup>, Joseph Bondy-Denomy<sup>4,5</sup>, Mathuram Santosham<sup>6</sup>, Jason R. Andrews<sup>3</sup>, Samir K. Saha<sup>1,7,\*</sup>

5 <sup>1</sup>Child Health Research Foundation, Department of Microbiology, Dhaka Shishu Hospital,

6 Dhaka, Bangladesh

7 <sup>2</sup>MRC Laboratory of Molecular Biology, Cambridge, United Kingdom

8 <sup>3</sup>Division of Infectious Diseases and Geographic Medicine, Stanford University School of

9 Medicine, Stanford, CA, United States of America

10 <sup>4</sup>Department of Microbiology and Immunology, University of California, San Francisco, San

11 Francisco, CA, USA

12 <sup>5</sup>Quantitative Biosciences Institute, University of California, San Francisco, San Francisco, CA,

13 USA

14 <sup>6</sup>Department of International Health, Johns Hopkins Bloomberg School of Public Health,

15 Baltimore, MD, USA

16 <sup>7</sup>Bangladesh Institute of Child Health, Dhaka Shishu Hospital, Dhaka, Bangladesh

17

18 <sup>#</sup>These authors contributed equally to the study

19

20 <sup>\*</sup>Corresponding authors and lead contacts; send correspondences to Senjuti Saha

21 (senjutisaha@chrfd.org) and Samir K Saha (samir@chrfd.org)

22

23 **Abstract**

24 With rising fluoroquinolone and ceftriaxone-resistant *Salmonella* Typhi, azithromycin, a  
25 macrolide, has become the last oral drug available against typhoid. Between 2009-2016, we  
26 isolated 1,082 *Salmonella* Typhi and Paratyphi A strains in Bangladesh, 13 (12 Typhi and 1  
27 Paratyphi A) of which were azithromycin-resistant. When compared to 462 previously  
28 sequenced Typhi strains, the genomes of the 12 azithromycin-resistant Typhi strains (4.3.1 sub-  
29 clade, H58) harbored an exclusive non-synonymous single-point mutation R717Q in AcrB, an  
30 RND-efflux pump. Expression of AcrB-R717Q in *E. coli* and Typhi strains increased its  
31 minimum inhibitory concentration (MIC) for azithromycin by 11- and 3-fold respectively. The  
32 azithromycin-resistant Paratyphi A strain also contained a mutation at R717 (R717L), whose  
33 introduction in *E. coli* and Paratyphi A strains increased MIC by 7- and 3-fold respectively,  
34 confirming the role of R717 mutations in conferring azithromycin resistance. With increasing  
35 azithromycin use, strains with R717 mutations may spread leading to treatment failures, making  
36 antibiotic stewardship and vaccine introduction imperative.

37

## 38 **Introduction**

39 Typhoid and paratyphoid, collectively known as enteric fever, are among the most common  
40 bacterial causes of morbidity worldwide, with the greatest burden in low- and middle-income  
41 countries (GBD 2017 Typhoid and Paratyphoid Collaborators, 2019). *Salmonella*  
42 *enterica* subspecies *enterica* serovars Typhi (*Salmonella* Typhi) and Paratyphi (A, B and C),  
43 etiologies of enteric fever, cause an estimated 14 million illnesses and 136,000 deaths annually.

44  
45 In the pre-antibiotic era, enteric fever mortality rates exceeded 20% in many areas, but  
46 ampicillin, chloramphenicol and co-trimoxazole were instrumental in reducing the rates to <1%.  
47 Resistance to all three antibiotics (referred to as multidrug resistance, MDR) emerged in late  
48 1980's (Mirza et al., 1996), predominantly due to the rise and subsequent continental migration  
49 of H58 haplotype (now referred to as 4.3.1), which contained the resistance genes either on  
50 IncH1 plasmids or integrated within the chromosome (Holt et al., 2011; Wong et al., 2015,  
51 2016). Fluoroquinolones soon became the most-commonly prescribed antibiotic (White et al.,  
52 1996), but since the 2000's there have been increasing reports of decreased fluoroquinolone  
53 susceptibility due to the acquisition of chromosomal mutations in the DNA gyrase and  
54 topoisomerase IV genes (Roumagnac et al., 2006; Chau et al., 2007, Dimitrov et al., 2007; Pham  
55 Thanh et al., 2016). In Bangladesh, >99% of all Typhi and Paratyphi strains exhibit decreased  
56 susceptibility to ciprofloxacin (Saha et al., 2018b). In 2011, WHO recommended ceftriaxone or  
57 azithromycin for treating *Salmonella* Typhi non-susceptible to fluoroquinolones (Balasegaram et  
58 al., 2012).

59

60 There have been sporadic reports of ceftriaxone-resistant *Salmonella* Typhi strains, (Saha et al.,  
61 1999; Djeghout et al., 2018), but in 2016, an outbreak of extensively drug-resistant  
62 (XDR) *Salmonella* Typhi, resistant to chloramphenicol, ampicillin, cotrimoxazole,  
63 fluoroquinolones, and third-generation cephalosporins was recognized in Pakistan and to date  
64 >1000 cases have been confirmed (Andrews et al., 2018). Cephalosporin resistance of the XDR  
65 strains was caused by the acquisition of a broad-spectrum beta-lactamase (bla-CTX-M-15) on an  
66 IncY plasmid found in other enteric species. Typhoid patients in Pakistan are primarily being  
67 treated with the last available oral option, the macrolide azithromycin, resistance to which is rare  
68 (Klemm et al., 2018, Parry et al., 2015). This increasing use of azithromycin places selective  
69 pressure for the emergence and spread of azithromycin-resistant isolates, raising concerns of  
70 untreatable infections and increased mortality rates. Little is known about azithromycin  
71 resistance in typhoidal *Salmonella*; while there are some sporadic reports on azithromycin  
72 treatment failures (Molloy et al., 2010; Sjölund-Karlsson et al., 2011; Wong et al., 2015; Patel et  
73 al., 2017), there are no data on the molecular mechanism of resistance.

74

75 In Bangladesh, *Salmonella* Typhi and Paratyphi A are the most common causes of bloodstream  
76 infections in children >2 months of age and comprise of two-third of blood-culture positive  
77 isolates in microbiology laboratories (Saha et al., 2017). Leveraging our surveillance system in  
78 place for enteric fever, here we describe the emergence of azithromycin resistance among  
79 typhoidal *Salmonella* in Bangladesh and identify the molecular basis behind this resistance.

80

## 81 **Result and Discussion**

### 82 **Emergence of azithromycin-resistant *Salmonella* Typhi and Paratyphi A**

83 Between 2009 and 2016, through our enteric fever surveillance (Saha et al., 2017) in the  
84 inpatient departments of the two largest pediatric hospitals of Bangladesh, we isolated 939  
85 *Salmonella* Typhi and 143 Paratyphi A strains. Twelve of the Typhi and one of the Paratyphi A  
86 strains were resistant to azithromycin, with disc diameters of  $\leq 12$  mm, and minimum inhibitory  
87 concentration (MIC) of  $\geq 32$   $\mu\text{g/ml}$  (Parry et al., 2015). All 12 azithromycin-resistant *Salmonella*  
88 Typhi strains were also MDR and were increasingly isolated since 2013 (Fig 1A), marking  
89 gradual emergence of azithromycin-resistant *Salmonella* Typhi in Bangladesh. All patients lived  
90 in Dhaka city, known to be endemic for typhoid (Figure S1).

91

## 92 **Azithromycin resistant *Salmonella* Typhi harbors a mutation in the AcrB efflux pump**

93 We sequenced the 12 azithromycin-resistant Typhi strains and found that all azithromycin-  
94 resistant strains belonged to genotype 4.3.1 (H58), the most common genotype found in South  
95 Asia (Tanmoy et al., 2018; Wong et al., 2015). In a whole-genome single nucleotide  
96 polymorphism (SNP) tree, the 12 strains clustered together indicating that they are genetically  
97 similar to one another and potentially arose for a single common parental strain (Figure 1B). To  
98 identify the genetic basis of azithromycin resistance, we used three bioinformatic tools: SRST2  
99 (Inouye et al., 2014), Resfinder (Zankari et al., 2012) and CARD (Jia et al., 2017) and to evaluate  
100 the results obtained from these tools, we tested antimicrobial susceptibility against a panel of  
101 nine other antibiotics (Figure 1C). While the tools successfully predicted the observed  
102 susceptibility patterns for the nine antibiotics, no known azithromycin resistance mechanism was  
103 identified (Figure 1C). Using PlasmidFinder (Carattoli et al., 2014) we identified two plasmids  
104 found in these *Salmonella* Typhi strains: (i) IncQ1 (12/12 strains), containing genes for  
105 ampicillin, co-trimoxazole and chloramphenicol resistance, and (ii) InFIB (12/12 strains), a

106 plasmid commonly found in *Salmonella* Typhi strains (Kidgell et al., 2002; Park et al., 2018).  
 107 Both these plasmids were also present in closely related azithromycin-sensitive strains. The lack  
 108 of known azithromycin-resistance genes indicated a novel mechanism of azithromycin resistance  
 109 in these strains.  
 110

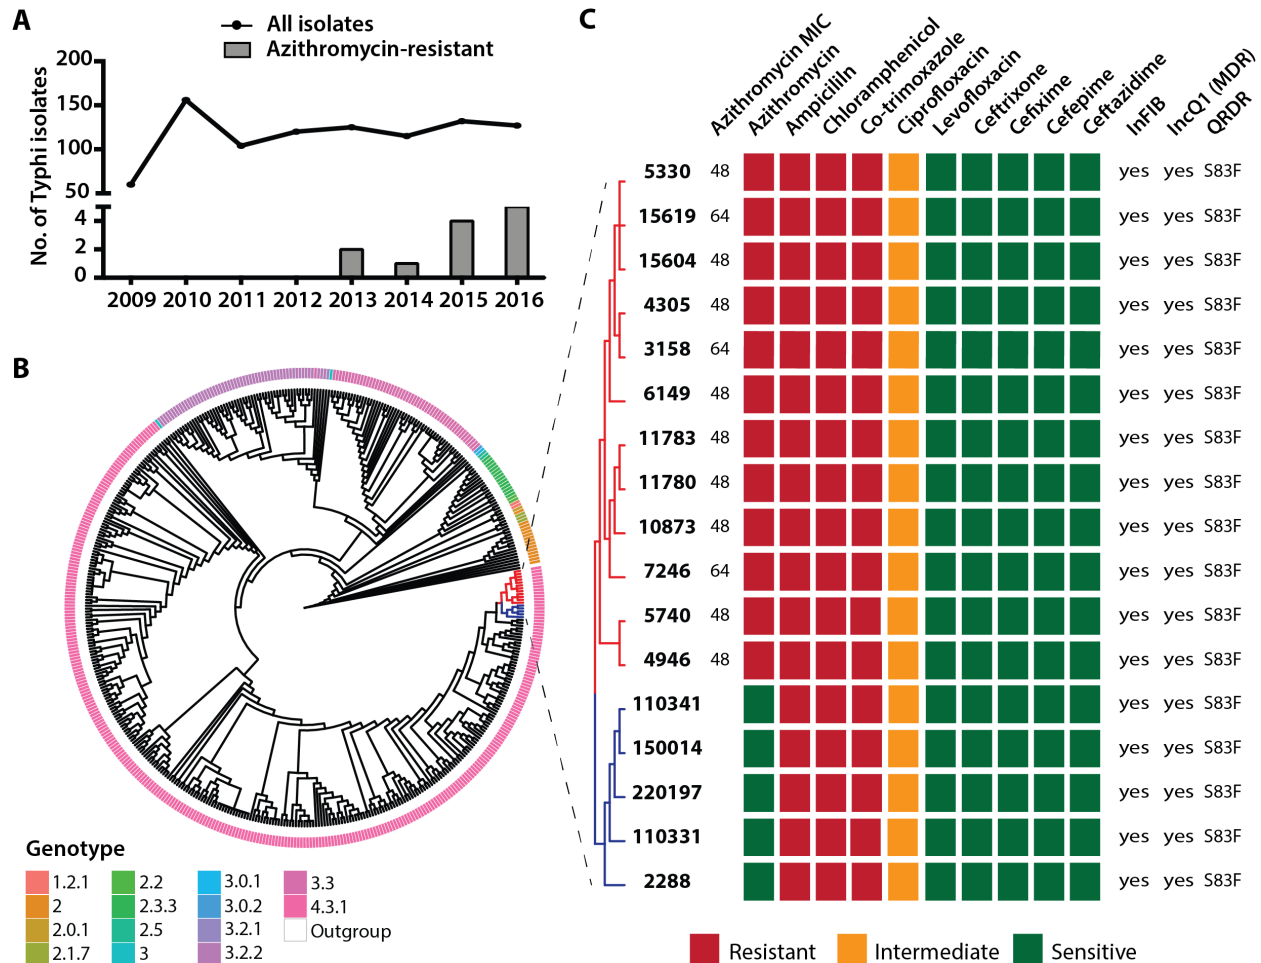

111  
 112 **Figure 1: Emergence of azithromycin-resistant strains of *Salmonella* Typhi in Bangladesh**  
 113 **and their genomic analysis. A)** Temporal distribution of 939 *Salmonella* Typhi isolates  
 114 included in the study. The number of isolates is shown as the line plot from 2009-2016. The  
 115 numbers of azithromycin-resistant strains isolated each year is shown in the bar plot.  
 116 Azithromycin-resistant strains were first isolated in 2013. **B)** Whole-genome SNP tree of 474  
 117 *Salmonella* Typhi strains isolated in Bangladesh previously (Tanmoy et al., 2018). The tree  
 118 highlights the different genotypes that are found in Bangladesh including the most prevalent  
 119 genotype 4.3.1 (H58 haplotype). The 12 azithromycin-resistant strains (colored in red) clustered

120 together within the genotype 4.3.1. *Salmonella* typhimurium strain LT2 was used as an outgroup.  
121 C) Predicted and experimentally determined antimicrobial susceptibility pattern of azithromycin-  
122 resistant *Salmonella* Typhi strains and the most-closely related five azithromycin-sensitive  
123 strains. The antimicrobial susceptibility was experimentally determined through disc diffusion  
124 assay against a panel of 10 antibiotics. The predicted transmissible elements and antimicrobial  
125 resistance markers are also shown.

126  
127 We compared the sequences of these 12 azithromycin-resistant strains to that of 462 Typhi  
128 strains that we had previously sequenced and genetically characterized (Tanmoy et al., 2018). In  
129 the WGS SNP tree, we identified four unique SNPs, present only in the 12 azithromycin-resistant  
130 strains, three of which were non-synonymous: STY2741 (codes for purN, a glycinamide  
131 ribonucleotide transferase), STY1399 (codes for a hypothetical protein) and  
132 STY0519 (codes for AcrB, an inner membrane permease) (Figure 2A, Figure S2). For the first  
133 two candidates, there is no evidence of their involvement in mediating antimicrobial resistance in  
134 the literature. However, the third gene, *acrB* is part of a trans-envelope resistance-nodulation-  
135 division (RND) efflux pump that has been previously reported to transport macrolides including  
136 azithromycin across the bacterial cell envelope, making it the most promising candidate  
137 (Nakashima et al., 2011). Mutations affecting expression of AcrB have been implicated in  
138 macrolide resistance in *Neisseria gonorrhoeae* (Wadsworth et al., 2018). Furthermore, laboratory  
139 mutagenesis studies in *Escherichia coli* have shown that mutations in *acrB* can lead to higher  
140 macrolide efflux thereby contributing to resistance (Ababou and Koronakis, 2016). The SNP  
141 observed in the 12 azithromycin-resistant *Salmonella* Typhi strains changed the arginine residue  
142 (R) at position 717 to a glutamine (Q) (Figure 2B). R717 is a conserved residue on the  
143 periplasmic cleft that acts as the entry portal for most drugs in AcrB (Figure 2C). In a previous  
144 mutagenesis study, substitution of the arginine residue with an alanine (R717A) was found to  
145 partially increase efflux of the macrolide erythromycin in *E. coli* (Yu et al., 2005).

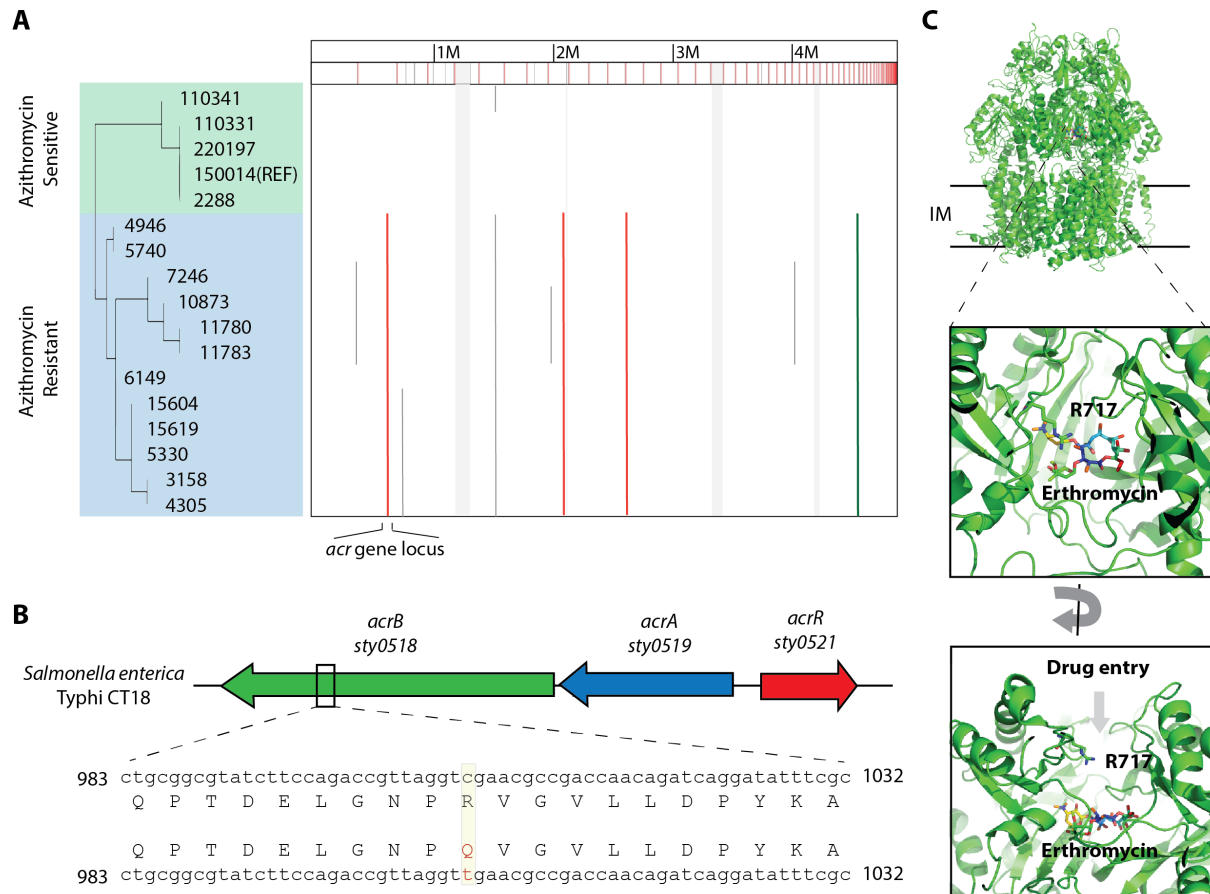

146

147 **Figure 2: Identification of R717Q mutation on AcrB efflux pump as a cause of**  
 148 **azithromycin resistance in *Salmonella Typhi*.** **A)** Whole genome sequence alignment of 12  
 149 azithromycin-resistant and 5 genetically related azithromycin-sensitive *Salmonella Typhi* strains.  
 150 Whole genome SNP detection and alignment was done using ParSNP and results were visualized  
 151 in GinGR (Treangen et al., 2014). The single nucleotide polymorphisms (SNPs) unique to the  
 152 resistant strains are highlighted with vertical lines. Four SNPs were identified: 3 non-  
 153 synonymous (shown as a red line) and 1 synonymous SNPs (shown as a brown line) that are  
 154 exclusive to the azithromycin resistant strains. **B)** The *acr* gene cluster in *Salmonella Typhi*  
 155 reference strain CT18. One of the SNPs found exclusively in azithromycin-resistant strains was  
 156 mapped to the gene cluster composed of: *acrA* (STY0519) and *acrB* (STY0518), that encodes a  
 157 periplasmic and inner membrane protein component of the RND-efflux pumps respectively, and  
 158 *acrR* (STY0521), a transcriptional regulator of AcrA/B protein synthesis. The SNP was present  
 159 on the *acrB* gene and resulted in the change of an arginine (R) at position 717 to a glutamine (Q)  
 160 residue on the encoded AcrB protein. **C)** R717Q mutation is present at the periplasmic cleft of  
 161 the proximal binding pocket on AcrB. Structure of *E. coli* AcrB (PDB ID: 3AOC) is shown in  
 162 green with the macrolide erythromycin bound in the proximal drug binding pocket. AcrB is



163 present in the inner membrane of the bacterial cells and drug molecules, including macrolides,  
164 enter the AcrB pump through a periplasmic opening that leads to a proximal binding pocket. The  
165 drug molecules are shuttled outside the cells through the proximal binding pocket with the help  
166 of the proton motive force. R717 lines the entry the periplasmic opening.  
167

### 168 **R717 mutations in AcrB confer azithromycin resistance**

169 We cloned *acrB* from azithromycin susceptible and resistant *Salmonella* Typhi strains into an *E.*  
170 *coli* plasmid and introduced them into an *E. coli* strain that lacks the endogenous *acrB* (*E. coli*  
171  $\Delta$ *acrB*). Compared to *E. coli* strains containing empty plasmid or wild type *acrB*, the strain  
172 expressing AcrB-R717Q showed a smaller zone of disc clearance for both azithromycin (26.3  
173 mm vs 16.7 mm,  $p = 0.0013$ ) and erythromycin discs (22.3 mm vs 11.7 mm,  $p$  value = 0.0009)  
174 and exhibited a 11-fold increase in azithromycin MIC (0.22  $\mu$ g/ml vs 2.7  $\mu$ g/ml,  $p = 0.0002$ )  
175 (Figure 3A, B). Certain AcrB mutations have previously been shown to effect transport of other  
176 antibiotics such as ciprofloxacin (Blair et al., 2015), but the R717Q mutation did not change the  
177 susceptibility patterns for any other nine antibiotics we tested (Figure S3). For further  
178 confirmation of the effects of this mutation in *Salmonella* Typhi, we introduced the plasmids in  
179 an azithromycin-sensitive Typhi strain and observed a 3-fold increase in MIC (5  $\mu$ g/ml vs 13  
180  $\mu$ g/ml,  $p < 0.0001$ ) in the presence of AcrB-R717Q (Figure 3C). The difference here is lower  
181 compared to that seen in *E. coli*  $\Delta$ *acrB* plausibly because the Typhi strain contains endogenous  
182 wild-type AcrB competing against the exogenous AcrB-R717Q that we artificially introduced.  
183 Taken together, these results confirm that AcrB-R717Q leads to increased macrolide resistance.

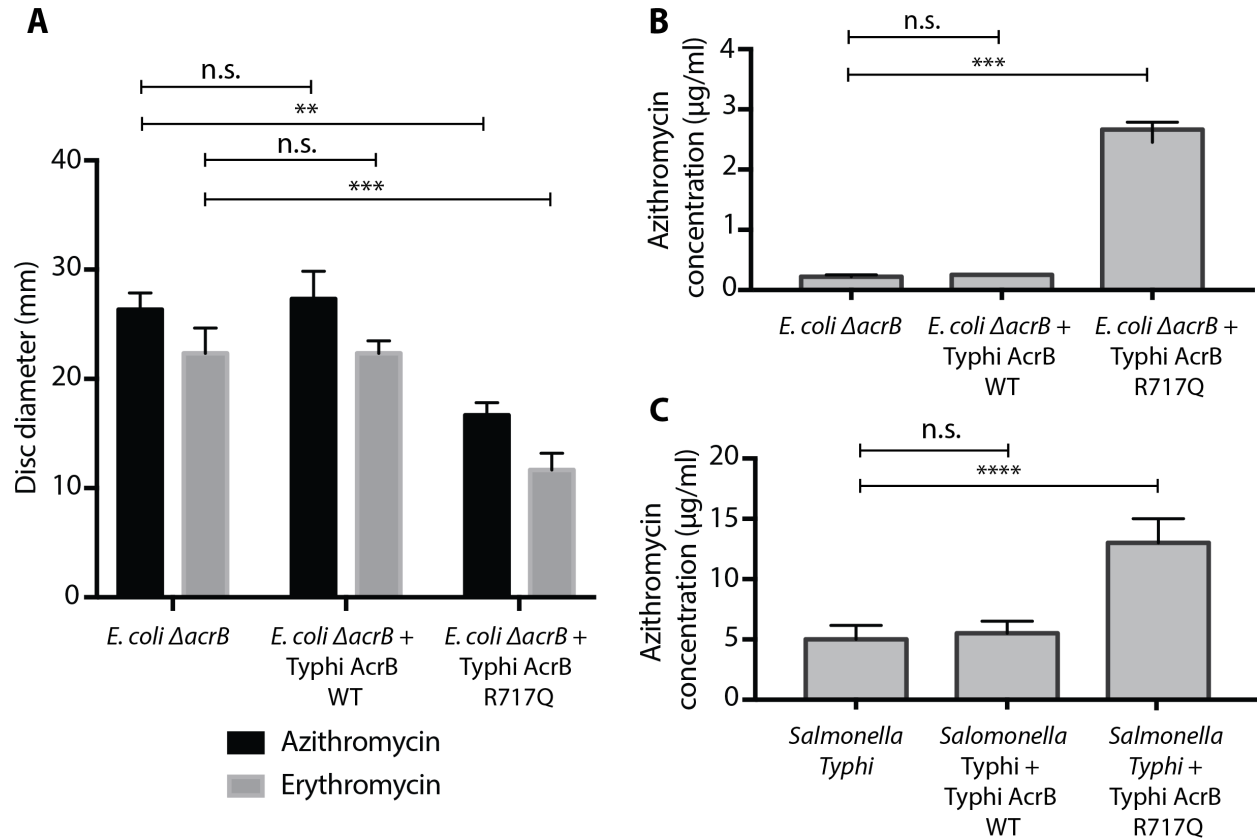

184

185 **Figure 3: AcrB R717Q increases efflux of macrolides in *E. coli* and *Salmonella* Typhi**  
 186 **strains.** Quantification of results obtained from three biological replicates for (A) disc diffusion  
 187 and (B) E-strip assays are shown for *E. coli* BW25113  $\Delta$ *acrB* transformed with different  
 188 plasmids. (C) Quantification of results obtained from at least three biological replicates from  
 189 azithromycin E-strip assay in Typhi strain 4119. One way-ANOVA with multiple comparisons  
 190 was used to test statistical significance. ns:  $p > 0.05$ ; \*\*:  $p \leq 0.01$ ; \*\*\*:  $p \leq 0.001$ , \*\*\*\*:  $p \leq$   
 191 0.0001

192

193 We conducted an extensive BLAST search to identify other typhoidal *Salmonella* strains with  
 194 mutations in AcrB the NCBI database and found only one *Salmonella* Typhi strain isolated in  
 195 Oceania in 2008 that contained the same R717Q mutation, however no AMR data were available  
 196 for this strain (Wong et al., 2015). Interestingly, whole genome sequencing of the one  
 197 azithromycin-resistant *Salmonella* Paratyphi A strain identified during our surveillance showed  
 198 that this strain also contained a mutation in *acrB* which changed R717 to a leucine (L) (Figure

199

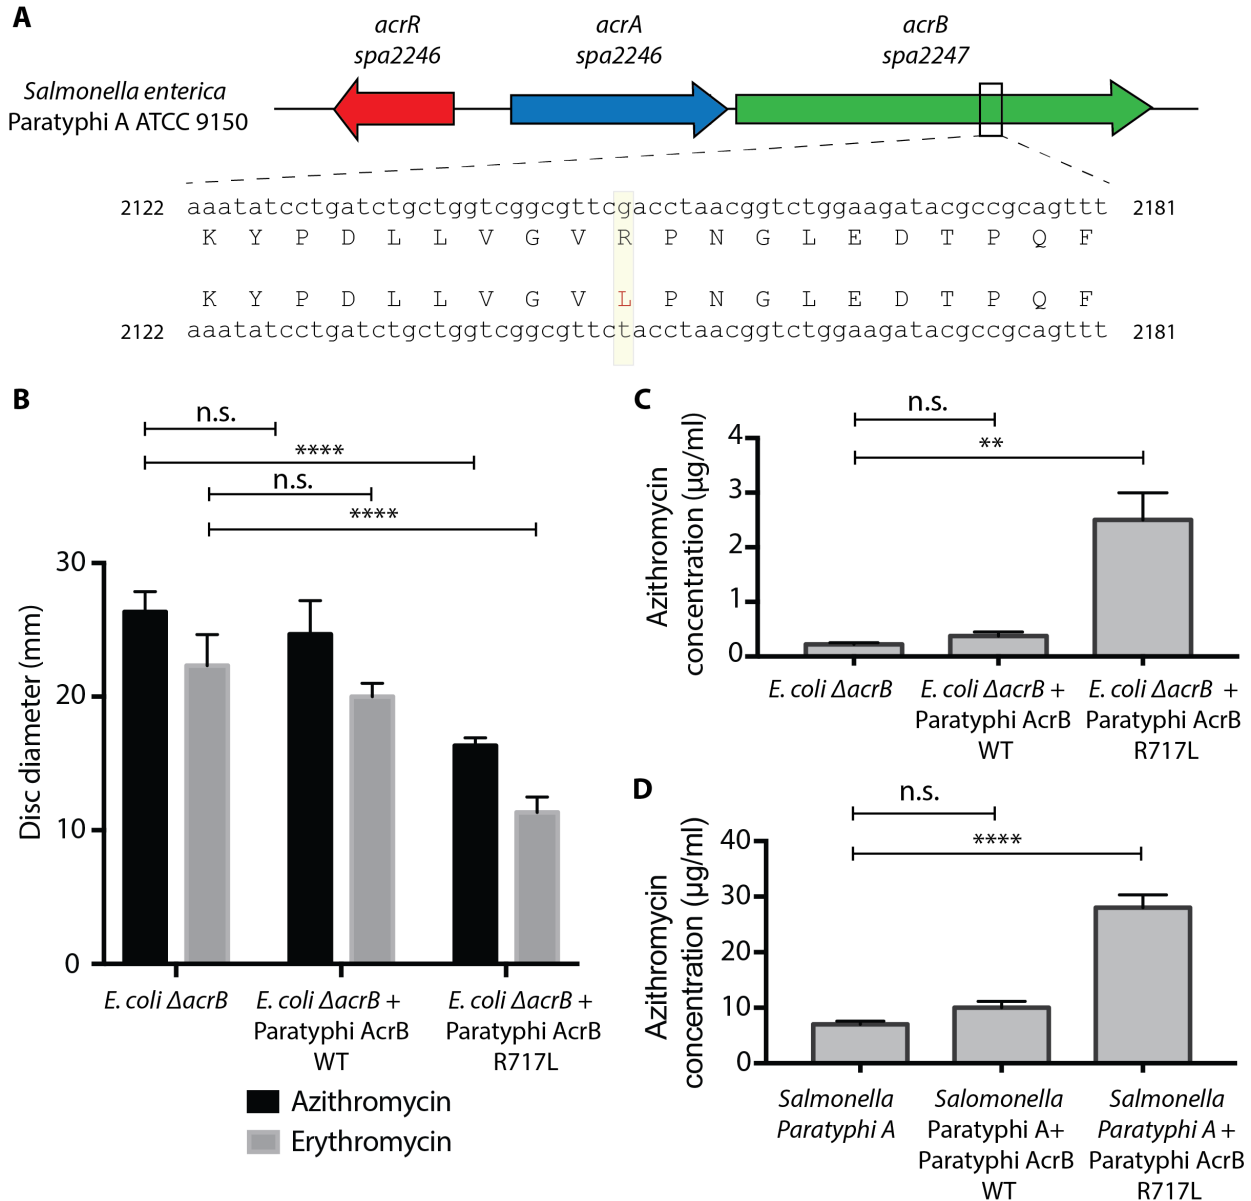

200

201 **Figure 4: Identification of R717L mutation in AcrB protein in *Salmonella* Paratyphi A**  
 202 **strains.** (A) Sequence alignment of *acrB* gene from the azithromycin-resistant *Salmonella*  
 203 Paratyphi A strain to the reference strain ATCC 9150. A SNP was identified that changed the  
 204 R717 to a leucine (L) residue. Quantification of results obtained from three biological replicates  
 205 for (B) disc diffusion and (C) E-strip assays in *E. coli* are shown. (D) Quantification of results  
 206 obtained from at least three biological replicates from azithromycin E-strip assay in Paratyphi  
 207 strain 4071 is shown. One way-ANOVA with multiple comparisons was used to test statistical  
 208 significance. ns:  $p > 0.05$ ; \*\*:  $p \leq 0.01$ ; \*\*\*\*:  $p \leq 0.0001$ .

209

210 4A). This mutation was absent in the genomes of the Paratyphi A strains in the NCBI database.  
211 To determine to effect of R717L mutation, we expressed Paratyphi wild-type AcrB and AcrB-  
212 R717L in *E. coli*  $\Delta$ *acrB* (Figure 4B, C). As seen for Typhi AcrB R717Q, Paratyphi AcrB-R717L  
213 leads to a smaller disc clearance for azithromycin (26.3 mm vs 16.3 mm,  $p = 0.0001$ ) and  
214 erythromycin (22.4 mm vs 11.4 mm,  $p = 0.0001$ ) and 10-fold higher azithromycin MIC (0.22  
215  $\mu\text{g/ml}$  vs 2.5  $\mu\text{g/ml}$ ,  $p = 0.003$ ). When these plasmids were introduced in a sensitive Paratyphi A  
216 strain, we observed 4-fold change in MIC (7  $\mu\text{g/ml}$  vs 28  $\mu\text{g/ml}$ ,  $p = 0.0001$ ) in the presence of  
217 the R717L mutation, confirming that mutations in R717 lead to macrolide resistance.  
218  
219 Rising antimicrobial resistance threatens the progress made so far in management of enteric  
220 fever. The rate of azithromycin resistance of typhoidal *Salmonella* in Bangladesh is low and the  
221 genetic basis is a chromosomal SNP. However, in light of the outbreak in Pakistan, increasing  
222 azithromycin use can place selective pressure on strains such as the ones with R717 mutations to  
223 spread. Although no azithromycin resistant XDR isolate has been reported to date, the increasing  
224 use of azithromycin and the clear historical record of widespread dissemination of resistance to  
225 all previously widely used antimicrobials by *Salmonella* Typhi and Paratyphi, suggest we will  
226 soon face strains resistant to all oral antibiotics. An azithromycin-resistant XDR strain would  
227 shift enteric fever treatment from outpatient departments, where patients are currently treated  
228 with oral azithromycin, to inpatient departments to be treated with injectable antibiotics like  
229 carbapenems, thereby weighing down already struggling health systems in endemic regions  
230 (Andrews et al., 2018; Saha et al., 2018a). Moreover, with the dearth of novel antimicrobials in  
231 the horizon, we risk losing our primary defense against widespread mortality from enteric fever.  
232 In addition to continued surveillance and antimicrobial stewardship, it is imperative to roll-out

233 the recent WHO prequalified typhoid conjugate vaccine in endemic areas and decrease the  
234 overall burden of typhoid.

235

## 236 **Materials and Methods**

### 237 **Study site and population**

238 In this study, we report data from enteric fever surveillance conducted in the inpatient  
239 departments of the two largest pediatric hospitals of Bangladesh, Dhaka Shishu (Children)  
240 Hospital, DSH, and Shishu Shasthya (Child Health) Foundation Hospital, SSFH. These are  
241 sentinel sites of the World Health Organization supported Invasive Bacterial Vaccine  
242 Preventable Diseases surveillance platform in Bangladesh.

243

### 244 **Patient enrollment, etiology detection and antibiogram**

245 Blood culture was performed at the discretion of the treating physicians. We enrolled patients  
246 with positive blood cultures for *Salmonella* Typhi or Paratyphi A. Blood cultures were  
247 performed using standard methods (Saha et al., 2017). We aseptically obtained 2–3 milliliters of  
248 blood, which was inoculated into trypticase soy broth supplemented with sodium polyanethole  
249 sulphionate (0.25%) and isovitalex (1%). Incubated blood culture bottles were sub-cultured on the  
250 second, third, and fifth days of incubation. Identification of *Salmonella* Typhi/Paratyphi isolates  
251 was confirmed using standard biochemical tests and agglutination with *Salmonella* species and  
252 serovar-specific antisera (Ramel, Thermo Fisher Scientific). Laboratory methods for blood  
253 culture and organism identification were consistent over the reporting period.

254

255 We used disc diffusion methods for determining antibiotic susceptibility patterns for  
256 azithromycin, ampicillin, co-trimoxazole, chloramphenicol, ciprofloxacin, levofloxacin,  
257 ceftriaxone, cefepime, cefixime and ceftazidime (Oxoid, Thermo Scientific, MA, USA).  
258 Azithromycin e-strips (bioMérieux, France) were used to determine the minimum inhibitory  
259 concentration (MIC) and confirm azithromycin resistance for strains that exhibited zone of  
260 clearance  $\leq 12$  mm in the presence of azithromycin discs. All results were interpreted according  
261 to the latest Clinical and Laboratory Standards Institute guidelines 2018.

262

### 263 **DNA extraction and whole genome sequencing**

264 We conducted whole genome sequencing on all identified azithromycin-resistant strains (12  
265 *Salmonella* Typhi and 1 Paratyphi A). Isolates were grown in MacConkey agar (Oxoid, UK)  
266 overnight and DNA was extracted from a suspension of the overnight culture using the QIAamp  
267 DNA minikit (Qiagen, Hilden, Germany). Whole genome sequencing was performed on the  
268 Illumina HiSeq 4000 platform to generate 150 bp paired-end reads (Novogene Co. Ltd., Beijing,  
269 China). We used SPAdes (Bankevich et al., 2012) to assemble the short paired-end reads into  
270 contigs for downstream analyses. All the sequences have been submitted to EnteroBase and  
271 NCBI (BioProject ID: PRJNA528114).

272

### 273 **Bioinformatics analysis**

274 For comparative genomic analysis, we compared the 12 azithromycin-resistant *Salmonella* Typhi  
275 strains with 462 strains that were previously isolated and genetically characterized by our group  
276 in Bangladesh (Tanmoy et al., 2018). Using the ParSNP tool (Treangen et al., 2014), we  
277 constructed whole-genome SNP tree using all 475 genomes and determined the genotypes using

278 srst2 package (Inouye et al., 2014). Ggtree was used to make the phylogenetic tree and overlay  
279 the genotype data (Yu et al., 2017). Srst2, ResFinder (Zankari et al., 2012) and CARD (Jia et al.,  
280 2017) were used to predict antimicrobial resistance markers, and PlasmidFinder (Carattoli et al.,  
281 2014) to identify the putative plasmids present in these strains. Finally, we compared the  
282 resistant strains to all sensitive *Salmonella* Typhi strains manually to find SNPs exclusive to the  
283 resistant strains (comparison to the most closely related 5 genomes are shown in Figure 1C)  
284 using the GinGR tool from the Harvest suite (Treangen et al., 2014). To predict the function of  
285 the SNPs on protein function, we examined the protein sequence and conducted structural  
286 analyses (Figure 2).

287

### 288 **Macrolide susceptibility test in *E. coli* and *Salmonella* Typhi**

289 We amplified the *acrB* genes from azithromycin-resistant *Salmonella* Typhi strain 5003 and  
290 Paratyphi A strain 3144 and azithromycin-sensitive Typhi strain 4119 and Paratyphi A strain  
291 4071 for downstream cloning. The genes were inserted into the multiple cloning site of  
292 pHERD30T using Gibson assembly (Gibson et al., 2009). We verified the sequences of all  
293 inserted genes through Sanger sequencing. The plasmids were chemically transformed into  
294 CaCl<sub>2</sub>-competent *E. coli* BW25112  $\Delta$ *acrB* strains, and electroporated into Typhi strain 4119 and  
295 Paratyphi A strain 4071. *E. coli* strains with plasmids (with or without an insert) were tested for  
296 susceptibility patterns for erythromycin, azithromycin, ampicillin, co-trimoxazole,  
297 chloramphenicol, ciprofloxacin, levofloxacin, ceftriaxone, cefepime, cefixime and ceftazidime  
298 using the disc diffusion method, and MIC was determined using azithromycin E-strips. Typhi  
299 and Paratyphi strains with plasmids (with or without an insert) were tested for susceptibility  
300 patterns for azithromycin using E-strips.

301 **Acknowledgements**

302 We are thankful to Dr. Shweta Karambelkar, Dr. Balint Csorgo, and Beatriz A. Osuna of  
303 University of California, San Francisco, and Sunita Patil of Stanford University for technical  
304 assistance with laboratory work and to Arif M. Tanmoy of the Child Health Research Foundation  
305 for bioinformation guidance.

306

307 **Funding**

308 No external funding was attained for this study. The enteric fever surveillance in Dhaka Shishu  
309 (Children) Hospital was supported by Gavi, the Vaccine Alliance, through the World health  
310 Organization-supported Invasive Bacterial Vaccine Preventable Diseases study (grant numbers  
311 201588766, 201233523, 201022732, 200749550, 201686542)

312

313 **Conflict of interest**

314 Authors declare no conflict of interest pertaining to the work presented here.



## References

- 315 Ababou A, Koronakis V. 2016. Structures of Gate Loop Variants of the AcrB Drug Efflux Pump  
316 Bound by Erythromycin Substrate. *PLOS ONE* **11**:e0159154.  
317 doi:10.1371/journal.pone.0159154
- 318 Andrews JR, Qamar FN, Charles RS, Ryan ET. 2018. Extensively Drug-Resistant Typhoid —  
319 Are Conjugate Vaccines Arriving Just in Time? *NEJM* **379**:1493–1495.
- 320 Balasegaram S, Potter AL, Grynszpan D, Barlow S, Behrens RH, Lighton L, Booth L, Inamdar  
321 L, Neal K, Nye K, Lawrence J, Jones J, Gray I, Tolley D, Lane C, Adak B, Cummins A,  
322 Addiman S. 2012. Guidelines for the public health management of typhoid and  
323 paratyphoid in England: Practice guidelines from the National Typhoid and Paratyphoid  
324 Reference Group. *Journal of Infection* **65**:197–213. doi:10.1016/j.jinf.2012.05.005
- 325 Bankevich A, Nurk S, Antipov D, Gurevich AA, Dvorkin M, Kulikov AS, Lesin VM, Nikolenko  
326 SI, Pham S, Prjibelski AD, Pyshkin AV, Sirotkin AV, Vyahhi N, Tesler G, Alekseyev  
327 MA, Pevzner PA. 2012. SPAdes: a new genome assembly algorithm and its applications  
328 to single-cell sequencing. *J Comput Biol* **19**:455–477. doi:10.1089/cmb.2012.0021
- 329 Blair JMA, Bavro VN, Ricci V, Modi N, Cacciotto P, Kleinekathöfer U, Ruggerone P, Vargiu  
330 AV, Baylay AJ, Smith HE, Brandon Y, Galloway D, Piddock LJV. 2015. AcrB drug-  
331 binding pocket substitution confers clinically relevant resistance and altered substrate  
332 specificity. *PNAS* **112**:3511–3516. doi:10.1073/pnas.1419939112
- 333 Carattoli A, Zankari E, García-Fernández A, Larsen MV, Lund O, Villa L, Aarestrup FM,  
334 Hasman H. 2014. In Silico Detection and Typing of Plasmids using PlasmidFinder and  
335 Plasmid Multilocus Sequence Typing. *Antimicrobial Agents and Chemotherapy* **58**:3895–  
336 3903. doi:10.1128/AAC.02412-14
- 337 Chau TT, Campbell JI, Galindo CM, Van Minh Hoang N, Diep TS, Nga TTT, Van Vinh Chau  
338 N, Tuan PQ, Page AL, Ochiai RL, Schultsz C, Wain J, Bhutta ZA, Parry CM,  
339 Bhattacharya SK, Dutta S, Agtini M, Dong B, Honghui Y, Anh DD, Canh DG, Naheed  
340 A, Albert MJ, Phetsouvanh R, Newton PN, Basnyat B, Arjyal A, La TTP, Rang NN,  
341 Phuong LT, Van Be Bay P, von Seidlein L, Dougan G, Clemens JD, Vinh H, Hien TT,  
342 Chinh NT, Acosta CJ, Farrar J, Dolecek C. 2007. Antimicrobial Drug Resistance of  
343 *Salmonella enterica* Serovar Typhi in Asia and Molecular Mechanism of Reduced

- 344 Susceptibility to the Fluoroquinolones. *Antimicrob Agents Chemother* **51**:4315–4323.  
345 doi:10.1128/AAC.00294-07
- 346 Dimitrov T, Udo EE, Albaksami O, Kilani AA, Shehab E-DMR. 2007. Ciprofloxacin treatment  
347 failure in a case of typhoid fever caused by *Salmonella enterica* serotype Paratyphi A  
348 with reduced susceptibility to ciprofloxacin. *Journal of Medical Microbiology* **56**:277–  
349 279. doi:10.1099/jmm.0.46773-0
- 350 Djeghout B, Saha S, Sajib MSI, Tanmoy AM, Islam M, Kay GL, Langridge GC, Endtz HP,  
351 Wain J, Saha SK. 2018. Ceftriaxone-resistant *Salmonella* Typhi carries an IncI1-ST31  
352 plasmid encoding CTX-M-15. *Journal of Medical Microbiology* **67**:620–627.  
353 doi:10.1099/jmm.0.000727
- 354 GBD 2017 Typhoid and Paratyphoid Collaborators. 2019. The global burden of typhoid and  
355 paratyphoid fevers: a systematic analysis for the Global Burden of Disease Study 2017.  
356 *Lancet Infect Dis*. doi:10.1016/S1473-3099(18)30685-6
- 357 Gibson DG, Young L, Chuang R-Y, Venter JC, Hutchison Iii CA, Smith HO. 2009. Enzymatic  
358 assembly of DNA molecules up to several hundred kilobases. *Nature Methods* **6**:343–  
359 345. doi:10.1038/nmeth.1318
- 360 Holt KE, Phan MD, Baker S, Duy PT, Nga TVT, Nair S, Turner AK, Walsh C, Fanning S,  
361 Farrell-Ward S, Dutta S, Kariuki S, Weill F-X, Parkhill J, Dougan G, Wain J. 2011.  
362 Emergence of a Globally Dominant IncHI1 Plasmid Type Associated with Multiple Drug  
363 Resistant Typhoid. *PLoS Negl Trop Dis* **5**. doi:10.1371/journal.pntd.0001245
- 364 Inouye M, Dashnow H, Raven L-A, Schultz MB, Pope BJ, Tomita T, Zobel J, Holt KE. 2014.  
365 SRST2: Rapid genomic surveillance for public health and hospital microbiology labs.  
366 *Genome Medicine* **6**:90. doi:10.1186/s13073-014-0090-6
- 367 Jia B, Raphenya AR, Alcock B, Waglechner N, Guo P, Tsang KK, Lago BA, Dave BM, Pereira  
368 S, Sharma AN, Doshi S, Courtot M, Lo R, Williams LE, Frye JG, Elsayegh T, Sardar D,  
369 Westman EL, Pawlowski AC, Johnson TA, Brinkman FSL, Wright GD, McArthur AG.  
370 2017. CARD 2017: expansion and model-centric curation of the comprehensive  
371 antibiotic resistance database. *Nucleic Acids Res* **45**:D566–D573.  
372 doi:10.1093/nar/gkw1004
- 373 Kidgell C, Pickard D, Wain J, James K, Diem Nga LT, Diep TS, Levine MM, O’Gaora P,  
374 Prentice MB, Parkhill J, Day N, Farrar J, Dougan G. 2002. Characterisation and

- 375 distribution of a cryptic *Salmonella typhi* plasmid pHCM2. *Plasmid* **47**:159–171.  
376 doi:10.1016/S0147-619X(02)00013-6
- 377 Klemm EJ, Shakoor S, Page AJ, Qamar FN, Judge K, Saeed DK, Wong VK, Dallman TJ, Nair S,  
378 Baker S, Shaheen G, Qureshi S, Yousafzai MT, Saleem MK, Hasan Z, Dougan G, Hasan  
379 R. 2018. Emergence of an Extensively Drug-Resistant *Salmonella enterica* Serovar Typhi  
380 Clone Harboring a Promiscuous Plasmid Encoding Resistance to Fluoroquinolones and  
381 Third-Generation Cephalosporins. *mBio* **9**:e00105-18. doi:10.1128/mBio.00105-18
- 382 Mirza SH, Beechmg NJ, Hart CA. 1996. Multi-drug resistant typhoid: a global problem. *Journal*  
383 *of Medical Microbiology* **44**:317–319. doi:10.1099/00222615-44-5-317
- 384 Molloy A, Nair S, Cooke FJ, Wain J, Farrington M, Lehner PJ, Torok ME. 2010. First Report of  
385 *Salmonella enterica* Serotype Paratyphi A Azithromycin Resistance Leading to  
386 Treatment Failure. *Journal of Clinical Microbiology* **48**:4655–4657.  
387 doi:10.1128/JCM.00648-10
- 388 Nakashima R, Sakurai K, Yamasaki S, Nishino K, Yamaguchi A. 2011. Structures of the  
389 multidrug exporter AcrB reveal a proximal multisite drug-binding pocket. *Nature*  
390 **480**:565–569. doi:10.1038/nature10641
- 391 Park SE, Pham DT, Boinett C, Wong VK, Pak GD, Panzner U, Espinoza LMC, Kalckreuth V  
392 von, Im J, Schütt-Gerowitt H, Crump JA, Breiman RF, Adu-Sarkodie Y, Owusu-Dabo E,  
393 Rakotozandrindrainy R, Soura AB, Aseffa A, Gasmelseed N, Keddy KH, May J, Sow  
394 AG, Aaby P, Biggs HM, Hertz JT, Montgomery JM, Cosmas L, Olack B, Fields B,  
395 Sarpong N, Razafindrabe TJL, Raminosoa TM, Kabore LP, Sampo E, Teferi M,  
396 Yeshitela B, Tayeb MAE, Sooka A, Meyer CG, Krumkamp R, Dekker DM, Jaeger A,  
397 Poppert S, Tall A, Niang A, Bjerregaard-Andersen M, Løfberg SV, Seo HJ, Jeon HJ,  
398 Deerin JF, Park J, Konings F, Ali M, Clemens JD, Hughes P, Sendagala JN, Vudriko T,  
399 Downing R, Ikumapayi UN, Mackenzie GA, Obaro S, Argimon S, Aanensen DM, Page  
400 A, Keane JA, Duchene S, Dyson Z, Holt KE, Dougan G, Marks F, Baker S. 2018. The  
401 phylogeography and incidence of multi-drug resistant typhoid fever in sub-Saharan  
402 Africa. *Nature Communications* **9**:5094. doi:10.1038/s41467-018-07370-z
- 403 Parry CM, Thieu NTV, Dolecek C, Karkey A, Gupta R, Turner P, Dance D, Maude RR, Ha V,  
404 Tran CN, Thi PL, Be BPV, Phi LTT, Ngoc RN, Ghose A, Dongol S, Campbell JI, Thanh  
405 DP, Thanh TH, Moore CE, Sona S, Gaiind R, Deb M, Anh HV, Van SN, Tinh HT, Day

- 406 NPJ, Dondorp A, Thwaites G, Faiz MA, Phetsouvanh R, Newton P, Basnyat B, Farrar JJ,  
407 Baker S. 2015. Clinically and Microbiologically Derived Azithromycin Susceptibility  
408 Breakpoints for *Salmonella enterica* Serovars Typhi and Paratyphi A. *Antimicrobial*  
409 *Agents and Chemotherapy* **59**:2756–2764. doi:10.1128/AAC.04729-14
- 410 Patel SR, Bharti S, Pratap CB, Nath G. 2017. Drug Resistance Pattern in the Recent Isolates of  
411 *Salmonella* Typhi with Special Reference to Cephalosporins and Azithromycin in the  
412 Gangetic Plain. *J Clin Diagn Res* **11**:DM01–DM03. doi:10.7860/JCDR/2017/23330.9973
- 413 Pham Thanh D, Karkey A, Dongol S, Ho Thi N, Thompson CN, Rabaa MA, Arjyal A, Holt KE,  
414 Wong V, Tran Vu Thieu N, Voong Vinh P, Ha Thanh T, Pradhan A, Shrestha SK,  
415 Gajurel D, Pickard D, Parry CM, Dougan G, Wolbers M, Dolecek C, Thwaites GE,  
416 Basnyat B, Baker S. 2016. A novel ciprofloxacin-resistant subclade of H58 *Salmonella*  
417 Typhi is associated with fluoroquinolone treatment failure. *eLife* **5**.  
418 doi:10.7554/eLife.14003
- 419 Roumagnac P, Weill F-X, Dolecek C, Baker S, Brisse S, Chinh NT, Le TAH, Acosta CJ, Farrar  
420 J, Dougan G, Achtman M. 2006. Evolutionary History of *Salmonella* Typhi. *Science*  
421 **314**:1301–1304. doi:10.1126/science.1134933
- 422 Saha S, Santosham M, Hussain M, Black RE, Saha SK. 2018a. Rotavirus Vaccine will Improve  
423 Child Survival by More than Just Preventing Diarrhea: Evidence from Bangladesh. *The*  
424 *American Journal of Tropical Medicine and Hygiene* **98**:360–363. doi:10.4269/ajtmh.17-  
425 0586
- 426 Saha Senjuti, Islam M, Saha Shampa, Uddin MJ, Rahman H, Das RC, Hasan M, Amin MR,  
427 Hanif M, Shahidullah M, Hussain M, Saha SK. 2018b. Designing Comprehensive Public  
428 Health Surveillance for Enteric Fever in Endemic Countries: Importance of Including  
429 Different Healthcare Facilities. *J Infect Dis* **218**:S227–S231. doi:10.1093/infdis/jiy191
- 430 Saha Senjuti, Islam M, Uddin MJ, Saha Shampa, Das RC, Baqui AH, Santosham M, Black RE,  
431 Luby SP, Saha SK. 2017. Integration of enteric fever surveillance into the WHO-  
432 coordinated Invasive Bacterial-Vaccine Preventable Diseases (IB-VPD) platform: A low  
433 cost approach to track an increasingly important disease. *PLOS Neglected Tropical*  
434 *Diseases* **11**:e0005999. doi:10.1371/journal.pntd.0005999
- 435 Saha SK, Talukder SY, Islam M, Saha S. 1999. A highly ceftriaxone-resistant *Salmonella* typhi  
436 in Bangladesh. *Pediatr Infect Dis J* **18**:387.

- 437 Sjölund-Karlsson M, Joyce K, Blickenstaff K, Ball T, Haro J, Medalla FM, Fedorka-Cray P,  
438 Zhao S, Crump JA, Whichard JM. 2011. Antimicrobial Susceptibility to Azithromycin  
439 among *Salmonella enterica* Isolates from the United States ▽ . *Antimicrob Agents*  
440 *Chemother* **55**:3985–3989. doi:10.1128/AAC.00590-11
- 441 Tanmoy AM, Westeel E, Bruyne KD, Goris J, Rajoharison A, Sajib MSI, Belkum A van, Saha  
442 SK, Komurian-Pradel F, Endtz HP. 2018. *Salmonella enterica* Serovar Typhi in  
443 Bangladesh: Exploration of Genomic Diversity and Antimicrobial Resistance. *mBio*  
444 **9**:e02112-18. doi:10.1128/mBio.02112-18
- 445 Treangen TJ, Ondov BD, Koren S, Phillippy AM. 2014. The Harvest suite for rapid core-genome  
446 alignment and visualization of thousands of intraspecific microbial genomes. *Genome*  
447 *Biology* **15**:524. doi:10.1186/s13059-014-0524-x
- 448 Wadsworth CB, Arnold BJ, Sater MRA, Grad YH. 2018. Azithromycin Resistance through  
449 Interspecific Acquisition of an Epistasis-Dependent Efflux Pump Component and  
450 Transcriptional Regulator in *Neisseria gonorrhoeae*. *mBio* **9**:e01419-18.  
451 doi:10.1128/mBio.01419-18
- 452 White NJ, Dung NM, Vinh H, Bethell D, Hien IT. 1996. Fluoroquinolone antibiotics in children  
453 with multidrug resistant typhoid. *The Lancet* **348**:547. doi:10.1016/S0140-  
454 6736(05)64703-4
- 455 Wong VK, Baker S, Connor TR, Pickard D, Page AJ, Dave J, Murphy N, Holliman R, Sefton A,  
456 Millar M, Dyson ZA, Dougan G, Holt KE, International Typhoid Consortium, Parkhill J,  
457 Feasey NA, Kingsley RA, Thomson NR, Keane JA, Weill F-X, Le Hello S, Hawkey J,  
458 Edwards DJ, Harris SR, Cain AK, Hadfield J, Hart PJ, Thieu NTV, Klemm EJ, Breiman  
459 RF, Watson CH, Edmunds WJ, Kariuki S, Gordon MA, Heyderman RS, Okoro C, Jacobs  
460 J, Lunguya O, Msefula C, Chabalgoity JA, Kama M, Jenkins K, Dutta S, Marks F,  
461 Campos J, Thompson C, Obaro S, MacLennan CA, Dolecek C, Keddy KH, Smith AM,  
462 Parry CM, Karkey A, Dongol S, Basnyat B, Arjyal A, Mulholland EK, Campbell JI,  
463 Dufour M, Bandaranayake D, Toleafoa TN, Singh SP, Hatta M, Newton PN, Dance D,  
464 Davong V, Onsare RS, Isaia L, Thwaites G, Wijedoru L, Crump JA, De Pinna E, Nair S,  
465 Nilles EJ, Thanh DP, Turner P, Soeng S, Valcanis M, Powling J, Dimovski K, Hogg G,  
466 Farrar J, Mather AE, Amos B. 2016. An extended genotyping framework for *Salmonella*

- 467 *enterica* serovar Typhi, the cause of human typhoid. *Nature Communications* **7**:12827.  
468 doi:10.1038/ncomms12827
- 469 Wong VK, Baker S, Pickard DJ, Parkhill J, Page AJ, Feasey NA, Kingsley RA, Thomson NR,  
470 Keane JA, Weill F-X, Edwards DJ, Hawkey J, Harris SR, Mather AE, Cain AK, Hadfield  
471 J, Hart PJ, Thieu NTV, Klemm EJ, Glinos DA, Breiman RF, Watson CH, Kariuki S,  
472 Gordon MA, Heyderman RS, Okoro C, Jacobs J, Lunguya O, Edmunds WJ, Msefula C,  
473 Chabalgoity JA, Kama M, Jenkins K, Dutta S, Marks F, Campos J, Thompson C, Obaro  
474 S, MacLennan CA, Dolecek C, Keddy KH, Smith AM, Parry CM, Karkey A, Mulholland  
475 EK, Campbell JI, Dongol S, Basnyat B, Dufour M, Bandaranayake D, Naseri TT, Singh  
476 SP, Hatta M, Newton P, Onsare RS, Isaia L, Dance D, Davong V, Thwaites G, Wijedoru  
477 L, Crump JA, De Pinna E, Nair S, Nilles EJ, Thanh DP, Turner P, Soeng S, Valcanis M,  
478 Powling J, Dimovski K, Hogg G, Farrar J, Holt KE, Dougan G. 2015. Phylogeographical  
479 analysis of the dominant multidrug-resistant H58 clade of *Salmonella* Typhi identifies  
480 inter- and intracontinental transmission events. *Nat Genet* **47**:632–639.  
481 doi:10.1038/ng.3281
- 482 Yu EW, Aires JR, McDermott G, Nikaido H. 2005. A Periplasmic Drug-Binding Site of the  
483 AcrB Multidrug Efflux Pump: a Crystallographic and Site-Directed Mutagenesis Study. *J*  
484 *Bacteriol* **187**:6804–6815. doi:10.1128/JB.187.19.6804-6815.2005
- 485 Yu G, Smith DK, Zhu H, Guan Y, Lam TT-Y. 2017. ggtree: an r package for visualization and  
486 annotation of phylogenetic trees with their covariates and other associated data. *Methods*  
487 *in Ecology and Evolution* **8**:28–36. doi:10.1111/2041-210X.12628
- 488 Zankari E, Hasman H, Cosentino S, Vestergaard M, Rasmussen S, Lund O, Aarestrup FM,  
489 Larsen MV. 2012. Identification of acquired antimicrobial resistance genes. *J Antimicrob*  
490 *Chemother* **67**:2640–2644. doi:10.1093/jac/dks261

491  
492  
493 **Supplementary Figures**

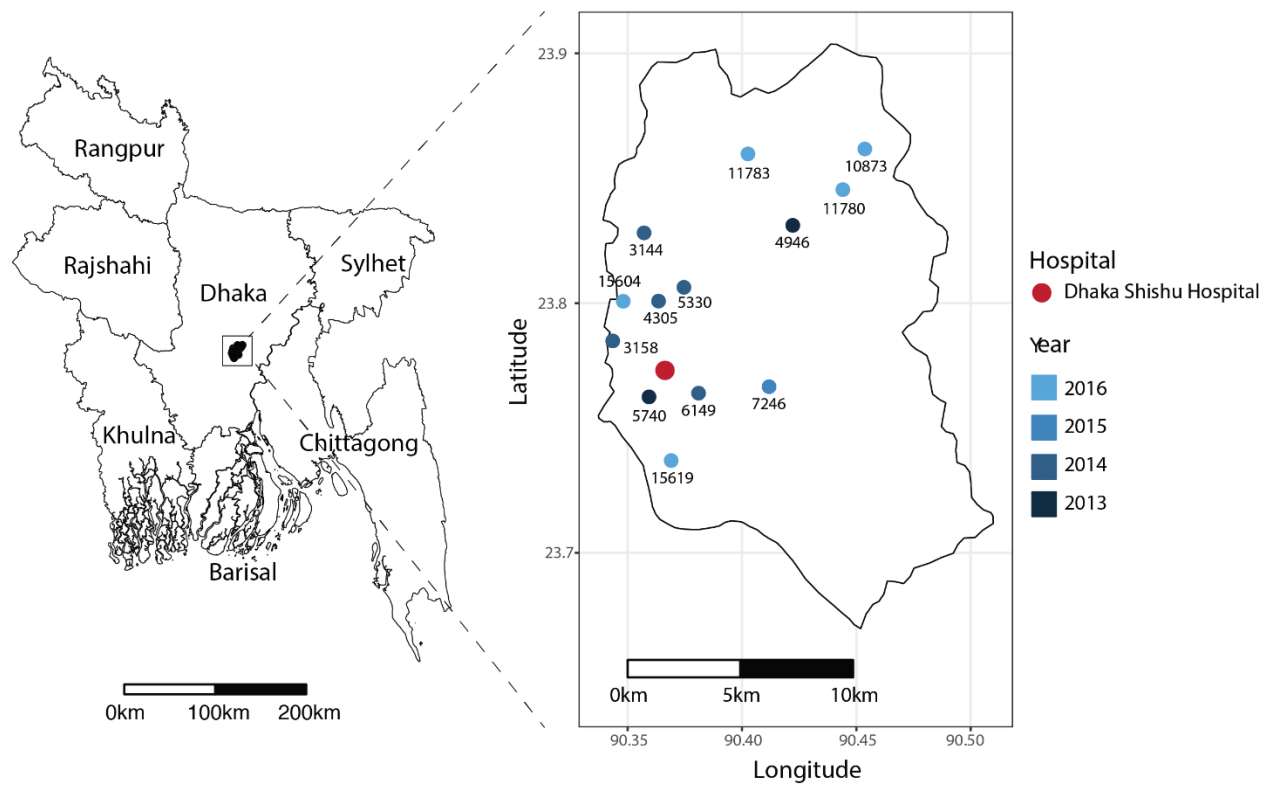

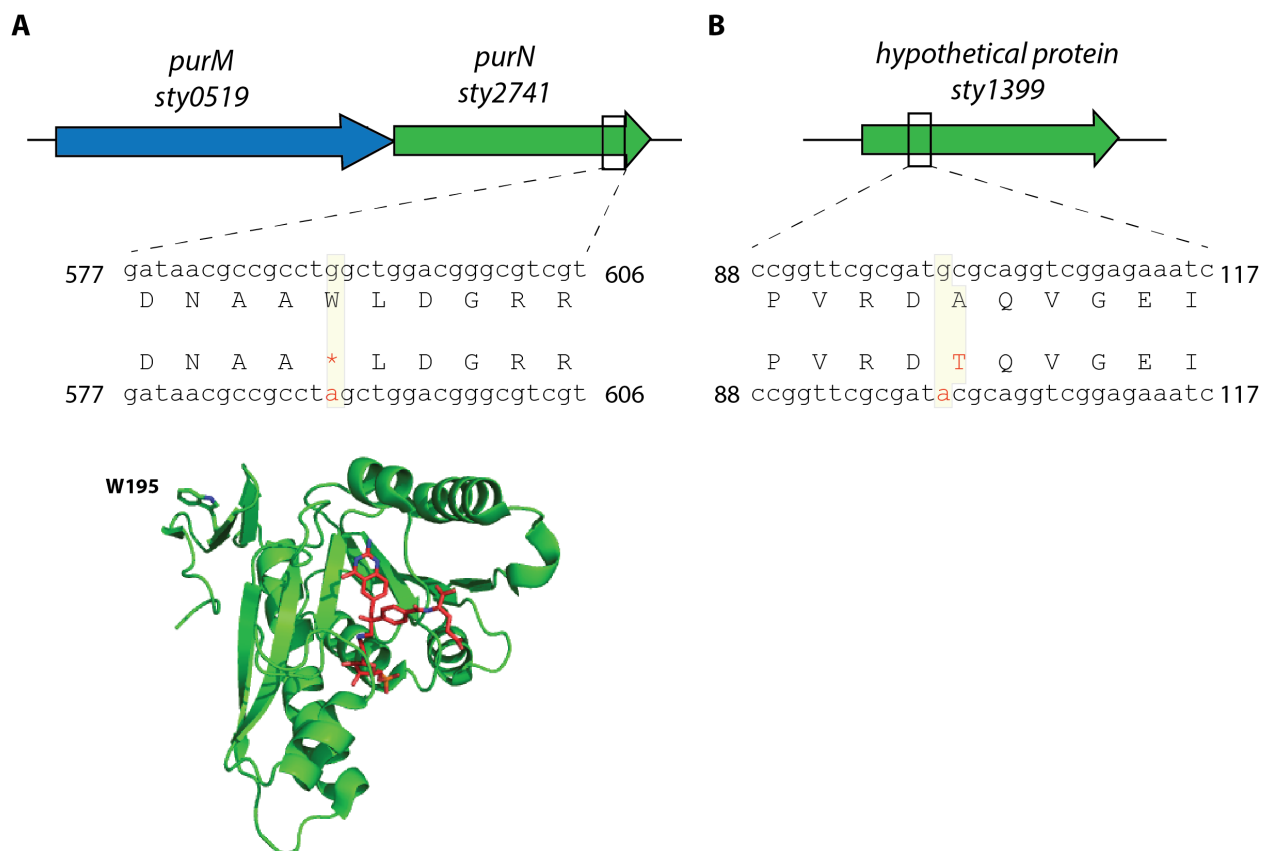

499

500 **Figure S2: Genetic and structural analysis of 2 other non-synonymous SNPs.** A) SNP on  
501 *sty2741* gene (also known as *purN*) that encodes a glycinamide ribonucleotide  
502 transformyltransferase (GAR-Tfase) enzyme. The SNP leads to change in W195 to a stop codon,  
503 leading to premature termination of the protein sequence. The structure of *E. coli* GAT-Tfase  
504 (green, PDB ID: 1C3E) in complex with an inhibitor (shown in red) highlighting the active site is  
505 shown. The W195 is present close to the C-terminus and premature termination at this position is  
506 predicted to not affect protein function. C) SNP on *sty1399* that encodes a hypothetical protein  
507 that is proposed to contain a B3/B4 tRNA-binding domain. The function of this protein is not  
508 known and the SNP results in conversion of an alanine residue at position 34 to a threonine  
509 residue. None of these two genes have been previously implicated in macrolide resistance.



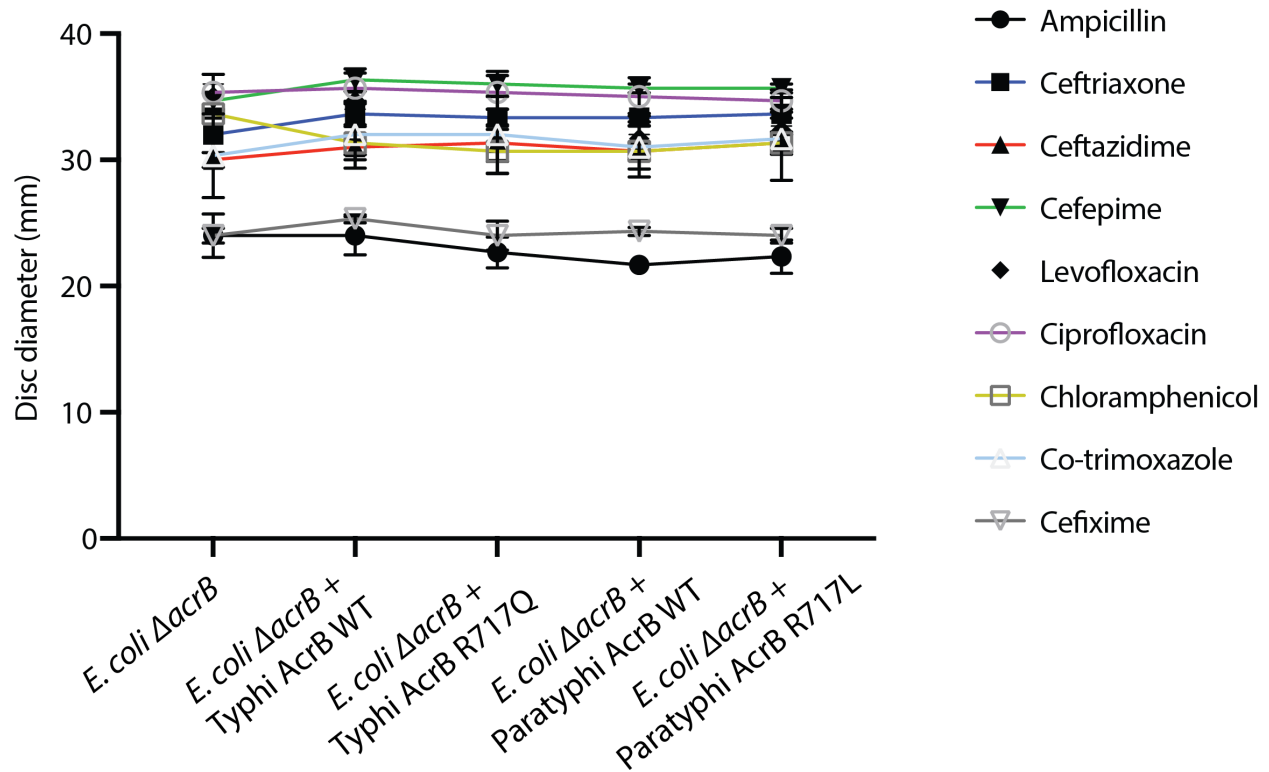

510

511 **Figure S3 – figure supplement 3: AcrB mutations do not affect efflux of other families of**  
512 **antibiotics.** Susceptibility of *E. coli* strains with empty, *Salmonella* Typhi AcrB WT/R717Q and  
513 Paratyphi A AcrB WT/R717L were tested against a panel of 9 different antibiotic including 5  
514 beta-lactams, 2 fluoroquinolones, 1 phenicol and 1 diaminopyrimidine /sulphonamide. The data  
515 are shown as mean and standard error from 3 different biological replicates.
